1 **Analysis of clinical characteristics of invasive**  
2 **non-typhoidal *Salmonella* infections in children: a 5-year**  
3 **dual-center retrospective study**

4 **Chenggang Lu<sup>1</sup>, Yongping Xie<sup>1</sup>, Yan Li<sup>1</sup>, Fangfang Cheng<sup>2</sup>, Lisu Huang<sup>1</sup>, Wang**  
5 **Hua<sup>1\*</sup>**

6 1 Department of Infectious Disease, Zhejiang University School of Medicine Children's  
7 Hospital, National Clinical Research Center for Child Health, Hangzhou, Zhejiang, China

8 2 Department of Infectious Disease, Children's Hospital of Soochow University, Suzhou,  
9 Jiangsu, China

10 \*huawang01@126.com

11 **Abstract**

12 Objective: To investigate the incidence, microbiological characteristics, clinical  
13 manifestations, and antibiotic resistance of invasive non-typhoidal *Salmonella* (iNTS)  
14 infections in children.

15 Methods: A retrospective study was conducted from January 2018 to December 2022 at  
16 two large teaching hospitals: Zhejiang University School of Medicine Children's Hospital  
17 (ZCH) and Children's Hospital of Soochow University (SCH). Medical records of  
18 culture-confirmed iNTS cases were reviewed, and a standardized case report form was  
19 used to collect demographic, clinical, and microbiological data.

20 Results: A total of 109 cases of iNTS infection were included, with 40 cases from SCH  
21 and 69 cases from ZCH. 71 cases (65.1%) were boys.. Infants under 1 year old accounted

22 NOTE: This preprint reports new research that has not been certified by peer review and should not be used to guide clinical practice.  
for 50.9% of the cases. Among the cases, 38 cases (34.9%) had underlying diseases;

23 mainly tumors (55.3%,21/38). The most common sites of infection were the bloodstream  
24 (84.4%) and bones and joints (12.8%). The most common serogroups were B (36.8%) ,C  
25 (44.7%) and D (38.2%). The overall resistance rate of ampicillin was 53.6%, ceftriaxone  
26 resistance rate was 17.8%, and carbapenem resistance rate was 0%. Seasonal trends  
27 indicated higher incidence rates during the summer.

28 Conclusion: iNTS infections in children primarily affect the bloodstream and  
29 bones/joints, with a significant proportion of cases in those with underlying medical  
30 conditions. Ceftriaxone remains the first-line antibiotic, but increasing resistance highlights  
31 the need for vigilant antimicrobial stewardship. Carbapenems can be considered as  
32 second-line antibiotics in severe cases. Further studies are needed to understand the  
33 molecular characteristics and improve treatment strategies for iNTS infections in pediatric  
34 patients.

## 35 Introduction

36 *Salmonella* is easily transmitted to the human body through foodborne and direct  
37 contact routes, and it is a common pathogen in pediatric gastrointestinal infections. Some  
38 cases present with extraintestinal infections, including bacteremia and secondary focal  
39 lesions. A systematic review estimated(1)that in 2017, there were 535,000 cases of  
40 invasive non-typhoidal *salmonella* (NTS) disease globally, resulting in 77,500 deaths.  
41 Megged et. al report that the age characteristics of NTS bloodstream infection show a  
42 U-shaped distribution and were more common in children and the elderly(2). The highest  
43 incidence rate of invasive non-typhoidal *salmonella* disease was observed in children  
44 under the age of 5, reaching 34.3 per 100,000 person-years(1). According to a systematic

45 review and analysis of literature on NTS invasive disease cases before June 2021, the  
46 overall pooled case-fatality ratio estimates were as follows: 14.7% in Africa, 14.0% in Asia,  
47 9.6% in the Americas, and 9.9% in Europe(3). Data from the provinces of Zhejiang and  
48 Henan in China indicate that 20.9% to 43.6% of NTS cases result in invasive infections,  
49 with 52.8% to 67.9% of these cases being bloodstream infections. Furthermore, more  
50 than half of the cases affected children(4). Bloodstream infections without appropriate  
51 antibiotic treatment are fatal, and changes in antibiotic resistance spectrum can lead to  
52 treatment failure and dissemination of infection. To date, there is a lack of comprehensive  
53 and in-depth understanding among pediatric clinicians regarding invasive salmonella  
54 infections, becoming a clinically significant issue that cannot be ignored.

## 55 **Materials and Methods**

### 56 **Study Population and Data Collection**

57 The study included all subtypes of NTS except for typhoid and paratyphoid strains.  
58 Invasive non-typhoidal *Salmonella* infections (iNTS) were defined as cases where  
59 specimens cultured from any normally sterile site were positive. The serogroup of the  
60 *Salmonella* isolates was determined using slide agglutination with antisera, and the  
61 isolates were classified into seven serogroups: serogroup A-E and other serogroups.  
62 Antimicrobial susceptibility testing was determined using a commercial microdilution  
63 method (VITEK COMPACT, BioMerieux, France), and the results were interpreted  
64 according to Clinical Laboratory Standards Institute guideline M100-ED32. Susceptibility  
65 to ampicillin, ceftriaxone, chloramphenicol, imipenem, ciprofloxacin, and  
66 trimethoprim/sulfamethoxazole (SMZ) was tested. *E. coli* ATCC25922 was used for quality

67 control. A retrospective analysis was conducted on iNTS data from the Zhejiang University  
68 School of Medicine Children's Hospital (ZCH) and the Children's Hospital of Soochow  
69 University (SCH) from January 2018 to December 2022. Medical records of confirmed  
70 cases were retrieved, and a standardized case report form was used to collect information  
71 on age, gender, underlying medical history, symptoms, laboratory examinations, and  
72 antimicrobial susceptibility. The pediatric sequential organ failure assessment (pSOFA)  
73 score was evaluated according to the previous literature(5). Meteorological data were  
74 obtained from the Zhejiang Government Services Network ([www.zjzfw.gov.cn](http://www.zjzfw.gov.cn)) and  
75 JiangSu Meteorological Administration ([js.cma.gov.cn](http://js.cma.gov.cn)).

#### 76 **Statistical Analysis**

77 Non-normal variables were presented as median and interquartile range; and  
78 categorical variables were described as frequencies. Differences in continuous variables  
79 between the bloodstream infection (BSI) group and non-BSI group, as well as between  
80 the age >1 year group and the age ≤ 1 year group, were compared using the  
81 nonparametric Mann-Whitney U test. Proportions were compared using the  $\chi$ -squared  
82 test.  $P < 0.05$  was considered statistically significant. All statistical analyses were  
83 performed using SPSS statistical 27.0 software (IBM, Armonk, NY, USA).

#### 84 **Ethics statement**

85 The study was approved by Medical Ethics Committee of the Zhejiang University  
86 School of Medicine Children's Hospital and the Children's Hospital of Soochow University  
87 (2024-IRB-0193-P-01). Written assent forms were obtained from all participants, along  
88 with written consent forms from their guardians.

## 89 **Results**

90 109 cases of iNTS infection were included in the study, with 40 cases from SCH and 69  
91 cases from ZCH. Of these, 71 cases (65.1%) were boys. Additionally, there were 33  
92 infants (30.3%) under one year old. 38 cases (34.9%) had underlying diseases, mainly  
93 tumors (21 cases), including 19 cases of acute leukemia, 1 case of bone tumor, and 1  
94 case of optic nerve neuroepithelial tumor. None of the cases were co-infected with HIV.  
95 There were 92 cases (84.4%) of bloodstream infection, 7 cases of bone marrow infection,  
96 7 cases of joint infection, 2 cases of central nervous system infection, and 1 case of  
97 pleural effusion. The median time to positive blood culture was 15.8 hours, and the  
98 median length of hospital stay was 12 days. There were three deaths, all from ZCH, two of  
99 which were boys with acute lymphoblastic leukemia and *Salmonella* group D infection,  
100 and one was a girl with acute monocytic leukemia and *Salmonella* group B infection. They  
101 had significantly elevated pSOFA scores. All three cases had decreased platelet counts  
102 and significantly elevated CRP levels.

103 In terms of monthly case numbers and temperature, the curve trends suggest a clear  
104 correlation between temperature and the number of cases in both children's hospitals,  
105 which increasing markedly in summer when temperatures are high. while the correlation  
106 with relative humidity is not obvious. (Fig.1)

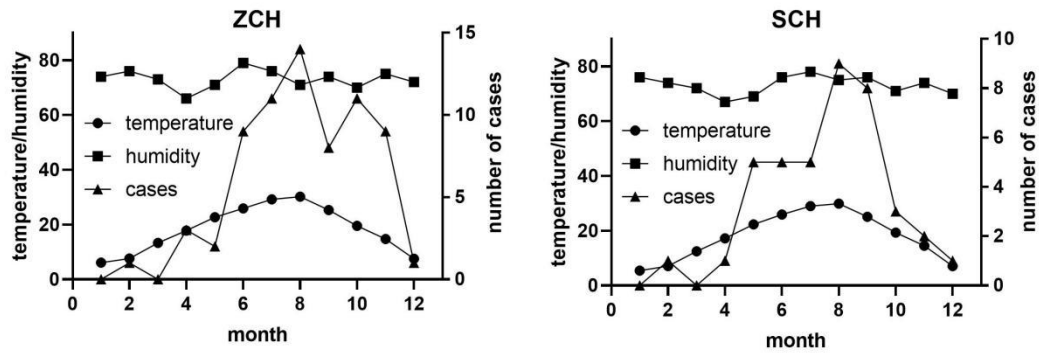

Fig. 1 Relationship between monthly distribution of iNTS infections and temperature and humidity

107

108 Compared to the BSI group, the non-BSI group had a significantly higher incidence of  
109 bone and joint symptoms (52.9% vs. 4.3%,  $P < 0.001$ ), higher white blood cell  
110 count [ $7.9 \times 10^9/L$  vs.  $11.1 \times 10^9/L$ ,  $P=0.009$ ], higher platelet count [ $226.5 \times 10^9/L$  vs.  
111  $414.0 \times 10^9/L$ ,  $P < 0.001$ ], and longer duration of effective antibiotic use (9.0days vs.  
112 25.0days,  $P < 0.001$ ). There were no significant differences in other indicators. (Tables 1)

113 Compared to children over 1 year old, infants aged 1 year or less with iNTS infection  
114 had a higher proportion of serogroups B strains (42.4% vs. 18.4%,  $P = 0.008$ ), a lower  
115 proportion of serogroups D strains (12.1% vs. 32.9%,  $P = 0.024$ ), a higher prevalence of  
116 gastrointestinal symptoms (57.6% vs. 26.3%,  $P = 0.002$ ), a lower proportion of  
117 hematological system involvement (0% vs. 25.0%,  $P = 0.002$ ), a lower proportion of  
118 underlying diseases (21.2% vs. 40.8%,  $P = 0.049$ ), a lower proportion of tumor (0% vs.  
119 27.6%,  $P = 0.001$ ), a lower proportion of deep venous catheterization (3.0% vs. 30.3%,  $P$   
120 = 0.002). There were no significant differences in other parameters. (Tables 1)

Table 1. Demographic and clinical manifestations of children with iNTS infections, 2018–2022.

| Variables                                 | n  | BSI                | n  | Non-BSI iNTS       | $\chi^2/Z$ | <i>P</i>   | n  | Age >1 year       | n  | Age ≤ 1 year       | $\chi^2/Z$ | <i>P</i>   |
|-------------------------------------------|----|--------------------|----|--------------------|------------|------------|----|-------------------|----|--------------------|------------|------------|
| Demographic                               |    |                    |    |                    |            |            |    |                   |    |                    |            |            |
| Boys, n (%)                               | 92 | 59(64.1)           | 17 | 12(70.6)           | 0.264      | 0.608      | 76 | 50(65.8)          | 33 | 21(63.6)           | 0.047      | 0.828      |
| Age, months, median (IQR)                 | 92 | 19.5(12.0,56.3)    | 17 | 17.0(10.1,23.0)    | -1.374     | 0.169      | /  | /                 | /  | /                  | /          | /          |
| Underlying diseases, n (%)                | 92 | 34(37.0)           | 17 | 4(23.5)            | 1.139      | 0.286      | 76 | 31(40.8)          | 33 | 7(21.2)            | 3.883      | 0.049      |
| Tumors, n (%)                             | 92 | 20(21.7)           | 17 | 1(5.9)             | 1.412      | 0.235      | 76 | 21(27.6)          | 33 | 0(0)               | 11.294     | 0.001      |
| Deep vein catheter, n (%)                 | 92 | 23(25.0)           | 17 | 1(5.9)             | 2.042      | 0.153      | 76 | 23(30.3)          | 33 | 1(3.0)             | 9.938      | 0.002      |
| Laboratory examinations                   |    |                    |    |                    |            |            |    |                   |    |                    |            |            |
| WBC, × 10 <sup>9</sup> /L, median (IQR)   | 92 | 7.9(4.3,11.7)      | 17 | 11.1(8.9,13.9)     | -2.622     | 0.009      | 76 | 7.6(3.8,11.1)     | 33 | 10.4(7.5,15.2)     | -3.242     | 0.001      |
| CRP, mg/L, median (IQR)                   | 92 | 17.4(5.8,34.3)     | 17 | 11.5(4.4,56.3)     | -0.167     | 0.867      | 76 | 13.1(2.5,32.6)    | 33 | 22.6(7.3,45.2)     | -1.636     | 0.102      |
| PCT, ng/mL, median (IQR)                  | 73 | 0.3(0.2,0.5)       | 9  | 0.2(0.1,10.5)      | -0.334     | 0.739      | 60 | 0.3(0.2,0.5)      | 22 | 0.4(0.2,0.8)       | -1.136     | 0.256      |
| Plt, × 10 <sup>9</sup> /L, median (IQR)   | 92 | 226.5(109.0,306.0) | 17 | 414.0(266.0,565.5) | -4.021     | <<br>0.001 | 76 | 212.5(64.0,298.3) | 33 | 311.0(253.5,380.5) | -4.327     | <<br>0.001 |
| ALT, U/L, median (IQR)                    | 92 | 30.0(16.3,62.6)    | 17 | 23.0(15.0,34.5)    | -1.282     | 0.200      | 76 | 26.2(16.0,55.8)   | 33 | 27.0(19.6,57.2)    | -0.571     | 0.568      |
| AST, U/L, median (IQR)                    | 92 | 48.2(36.0,81.1)    | 17 | 38.0(30.5,52.5)    | -1.716     | 0.086      | 76 | 47.0(33.2,69.8)   | 33 | 48.6(36.0,92.4)    | -0.966     | 0.334      |
| Total bilirubin, umol/L,<br>median (IQR)  | 91 | 5.4(3.6,10.5)      | 16 | 5.1(3.7,8.3)       | -0.135     | 0.892      | 74 | 5.7(4.0,10.7)     | 33 | 4.1(3.0,6.8)       | -1.886     | 0.059      |
| Serum creatinine, umol/L,<br>median (IQR) | 92 | 27.5(21.0,39.5)    | 17 | 24.0(17.0,36.0)    | -1.090     | 0.276      | 76 | 29.0(21.0,37.7)   | 33 | 23.6(20.2,39.5)    | -1.029     | 0.303      |
| Blood lactate, mmol/L,<br>median (IQR)    | 91 | 2.2(1.7,2.9)       | 17 | 2.0(1.5,2.5)       | -0.959     | 0.338      | 75 | 2.1(1.7,2.9)      | 33 | 2.4(1.7,3.0)       | -0.478     | 0.633      |
| Serogroup, n (%)                          |    |                    |    |                    |            |            |    |                   |    |                    |            |            |
| B                                         |    | 24(26.1)           |    | 4(24.5)            | 0.000      | 1.000      |    | 14(18.4)          |    | 14(42.4)           | 6.945      | 0.008      |
| C                                         | 92 | 26(28.3)           | 17 | 8(47.1)            | 2.362      | 0.124      | 76 | 25(32.9)          | 33 | 9(27.3)            | 0.339      | 0.560      |
| D                                         |    | 27(29.3)           |    | 2(11.8)            | 1.461      | 0.227      |    | 25(32.9)          |    | 4(12.1)            | 5.085      | 0.024      |

|                                                          |    |                 |    |                 |        |            |    |                 |    |                 |        |       |
|----------------------------------------------------------|----|-----------------|----|-----------------|--------|------------|----|-----------------|----|-----------------|--------|-------|
| E                                                        |    | 8(8.7)          |    | 0(0)            | 0.573  | 0.449      |    | 5(6.6)          |    | 3(9.1)          | 0.004  | 0.950 |
| non A-E                                                  |    | 7(7.6)          |    | 3(17.6)         | 0.740  | 0.390      |    | 7(9.2)          |    | 3(9.1)          | 0.000  | 1.000 |
| Source of infection                                      |    |                 |    |                 |        |            |    |                 |    |                 |        |       |
| BSI, n (%)                                               | /  | /               | /  | /               | /      | /          |    | 66              |    | 26              | 1.134  | 0.287 |
| Non-BSI, n (%)                                           | /  | /               | /  | /               | /      | /          |    | 10              |    | 7               |        |       |
| Clinical presentations, n (%)                            |    |                 |    |                 |        |            |    |                 |    |                 |        |       |
| Fever                                                    |    | 69(75.0)        |    | 10(58.8)        | 1.882  | 0.170      |    | 52(68.4)        |    | 27(81.8)        | 2.070  | 0.150 |
| Gastrointestinal symptoms                                |    | 35(38.0)        |    | 4(23.5)         | 1.315  | 0.251      |    | 20(26.3)        |    | 19(57.6)        | 9.785  | 0.002 |
| Cough                                                    |    | 7(7.6)          |    | 2(11.8)         | 0.327  | 0.567      |    | 6(7.9)          |    | 3(9.1)          | 0.043  | 0.835 |
| Hematological symptoms                                   | 92 | 18(19.6)        | 17 | 1(5.9)          | 1.866  | 0.172      | 76 | 19(25.0)        | 33 | 0(0)            | 9.992  | 0.002 |
| Bone and joint                                           |    | 4(4.3)          |    | 9(52.9)         | 32.255 | <<br>0.001 |    | 10(13.2)        |    | 3(9.1)          | 0.362  | 0.547 |
| Others                                                   |    | 7(7.6)          |    | 2(11.8)         | 0.009  | 0.926      |    | 6(7.9)          |    | 3(9.1)          | 0.000  | 1.000 |
| pSOFA≥2, n (%)                                           | 92 | 50(54.3)        | 17 | 5(29.4)         | 3.569  | 0.059      | 76 | 34(44.7)        | 33 | 20(60.6)        | 2.318  | 0.128 |
| Outcomes                                                 |    |                 |    |                 |        |            |    |                 |    |                 |        |       |
| Duration of effective antibiotic use, days, median (IQR) | 92 | 9.0(7.0,12.0)   | 17 | 25.0(11.5,42.0) | -4.091 | <<br>0.001 | 76 | 10.0(7.0,13.8)  | 33 | 9.0(6.5,13.0)   | -0.754 | 0.451 |
| Length of hospital stay, days, median (IQR)              | 92 | 12.0(9.0,17.8)  | 17 | 17.0(10.0,53.0) | -1.945 | 0.052      | 76 | 12.0(9.0,26.5)  | 33 | 13.0(8.5,17.0)  | -0.423 | 0.672 |
| Time to positive blood culture, hours, median (IQR)      | 92 | 15.8(13.0,21.2) | 17 | 16.8(8.4,46.5)  | -0.359 | 0.719      | 76 | 15.7(12.6,21.3) | 33 | 16.4(12.3,25.9) | -0.155 | 0.877 |
| Death, n (%)                                             | 92 | 3(3.3)          | 17 | 0(0)            | 0.570  | 0.450      | 76 | 3(3.9)          | 33 | 0(0)            | 1.339  | 0.247 |



122 In the strain serogroups, there were 28 cases (36.8%) in serogroup B, 34 cases (44.7%)  
 123 in serogroup C, 29 cases (38.2%) in serogroup D, 8 cases in serogroup E, and 10 cases  
 124 in non-A-E serogroup. The overall resistance rate of ampicillin was 53.6% (45/84),  
 125 ceftriaxone resistance rate was 17.8% (19/107), SMZ resistance rate was 27.1% (29/107),  
 126 ciprofloxacin insensitivity rate was 35.3% (30/85), chloramphenicol resistance rate was  
 127 35.6% (16/45), and carbapenem resistance rate was 0%. There were significant  
 128 differences in the resistance of ampicillin, ceftriaxone, SMZ, and chloramphenicol among  
 129 different NTS serogroups, while there was no significant difference in ciprofloxacin  
 130 insensitivity rate. (Table 2)

Table 2. Antibiotic resistance of different Serogroups of NTS to six antibiotics

| Antibiotic      | Serogroup B  | Serogroup C | Serogroup D  | Serogroup E | Serogroup non A-E | $\chi^2$ | P      |
|-----------------|--------------|-------------|--------------|-------------|-------------------|----------|--------|
| Ampicillin      | 12/21(57.1%) | 9/29(31.0%) | 19/25(76.0%) | 3/3(100%)   | 2/6(33.3%)        | 16.222   | 0.003  |
| Ceftriaxone     | 8/28(28.6%)  | 2/33(6.1%)  | 4/28(14.3%)  | 5/8(62.5%)  | 0/10(0%)          | 17.941   | 0.001  |
| SMZ             | 15/28(53.6%) | 6/33(18.2%) | 2/28(7.1%)   | 5/8(62.5%)  | 1/10(10.0%)       | 23.573   | <0.001 |
| Ciprofloxacin   | 11/21(52.4%) | 7/29(24.1%) | 9/26(34.6%)  | 1/3(33.3%)  | 2/6(33.3%)        | 4.254    | 0.373  |
| Chloramphenicol | 9/11(81.8%)  | 4/16(25.0%) | 2/15(13.3%)  | 1/1(100%)   | 0/2(0%)           | 18.368   | 0.001  |
| Carbapenems     | 0/20(0%)     | 0/17(0%)    | 0/17(0%)     | 0/8(0%)     | 0/7(0%)           | /        | /      |

131 **Discussion**

132 Among the 109 cases of iNTS, nearly 2/3 (65.1%) were boys, 38 cases had underlying  
 133 diseases, and nearly half had acute lymphoblastic leukemia. The three death cases all  
 134 came from bloodstream infection in children with hematological tumors after  
 135 chemotherapy. The pSOFA score increased significantly. Due to the small number of  
 136 death cases, statistical analysis of high-risk factors cannot be performed. pSOFA is helpful  
 137 for disease assessment and prognosis judgment. It should be mentioned that the pSOFA

138 score indicators include serum creatinine and bilirubin, which limits early clinical  
139 application(5). Different from the total case fatality rate estimated in global reviews of  
140 14.7%(3). there were few deaths in this study. Considering the different underlying  
141 disease spectrum, there were no children with HIV, which may also be the reason for the  
142 large difference in mortality. We noticed that there were no fatal cases reported in NTS  
143 bloodstream infection studies from Malaysia(6), Israel(2), Japan(7), and Taiwan, China(8).

144 The incidence of iNTS in children in both centers is related to temperature. During the  
145 high temperature season in summer, the number of incidences reaches a peak, while in  
146 winter and spring, the number of incidences decreases significantly. Possible factors  
147 include rising temperatures, easy reproduction of bacteria, easy deterioration of food, and  
148 water pollution, which are all risk factors for increasing NTS infection. Mohan et al. from  
149 Malaysia reported that there was no significant correlation between the monthly incidence  
150 of iNTS and the average monthly rainfall(9). In Hong Kong, China, it was reported that the  
151 peak of hospitalization for NTS infection was in June and the trough was in April(10). It  
152 shows that different latitudes in different regions are related to the seasonal  
153 characteristics of NTS incidence.

154 In this group of studies, the most common were BSI (84.4%) and bone and joint  
155 infection (12.8%). The clinical characteristics of the two groups and the antibiotic  
156 resistance are basically similar. The non-BSI iNTS group has a younger age of onset and  
157 longer antibiotic treatment time, suggesting that the non-BSI iNTS may have experienced  
158 a BSI process. Infections caused by blood circulation dissemination, it will take longer to  
159 clear the germs that spread the lesions. The higher white blood cell and platelet counts in

160 the non-BSI group suggest a more severe inflammatory response in cases of non-BSI.  
161 Clinically, joint infection may spread hematogenously or directly spread from open wounds.  
162 This data found that the clinical parameters of the BSI group and the non-BSI iNTS group  
163 were mostly the same, and the clinical characteristics were similar, suggesting that the  
164 invasive infection group without BSI had bloodstream infection in early stage and spread  
165 the lesions through the blood circulation. The antibiotic treatment time in the non-BSI iNTS  
166 group was 2.5 times longer, indicating that it takes longer to clear bacteria from bone  
167 marrow, joints, cerebrospinal fluid and other lesions. Two studies in the United States  
168 compared the duration of intravenous antibiotic treatment for NTS BSI in children with >3  
169 days to  $\leq 3$  days(11), and compared the duration of <7 days with  $\geq 7$  days(12). The clinical  
170 outcomes were good, and recommendations with oral antibiotics can be made as soon as  
171 possible. However, these two groups of cases were mild children with no invasive  
172 infection lesions and no underlying diseases, which were different from the cases studied  
173 in our groups.

174 Comparing the age groups, it can be found that serogroup B is more common in the  
175 infant group and serogroup D is less common. Clinical symptoms such as diarrhea and  
176 vomiting are more common. The proportion of older children with underlying diseases  
177 (mainly leukemia) and deep vein catheterization is higher than that of infants, indicating  
178 that with the age increases, acquired immune function strengthens, and the number of  
179 iNTS infections among children with normal immune function gradually decreases. The  
180 study by Sirinavin et al. from Thailand reported a group of 75 infant iNTS cases, including  
181 transient bacteremia (5), bacteremia without localized infection (37), bone and joint

182 infection (5) and meningitis (28); while in our two centers, the cases were primarily  
183 bloodstream infections, only 2 cases of central nervous system infection, indicating a  
184 different spectrum of the disease. This also highlights the importance for clinicians to be  
185 vigilant about intracranial infections in infant iNTS infections(13).

186 NTS from different specimen sources are similar in antibiotic resistance, suggesting that  
187 infections at other invasion sites may also be caused by dissemination of BSI. In this study,  
188 the serogroups were predominantly B, C, and D, with relatively few serogroups E and  
189 other groups, which is similar to what was reported by Megged et al(2). In the NTS BSI  
190 reported by Lee et al. in Taiwan, serogroup D was the most common(14), their study  
191 showed that the ampicillin resistance rate was 53%, the third-generation cephalosporin  
192 resistance rate gradually increased to 11%, and the ciprofloxacin resistance rate dropped  
193 from 20% to 11%. In this study, ampicillin resistance exceeded 50%, carbapenem  
194 resistance was 0%, SMZ resistance was 27%, ceftriaxone resistance was 18%, and  
195 ciprofloxacin was mostly intermediate, with a proportion close to 35%. Our data indicate  
196 the emergence of extensive resistance to ampicillin, suggesting that Salmonella has  
197 extensively produced  $\beta$ -lactamase. Most are sensitive to ceftriaxone, but the resistance  
198 rate continues to rise. Some studies have used pulsed field gel electrophoresis to identify  
199 Salmonella strains that are resistant to ceftriaxone and identified the blaCMY-2 gene on  
200 the Inc11 plasmid; through horizontal gene transfer, the MIC of ceftriaxone for the recipient  
201 strain increased from 0.125  $\mu$ g/mL to 32  $\mu$ g/mL(15). The ciprofloxacin resistance rate has  
202 not declined because there are more intermediaries, which is closely related to the  
203 breakpoints defined by the Clinical Laboratory Standards Institute guidelines. Comparing

204 the antibiotic resistance of different serogroups, it was found that serogroup E had the  
205 highest resistance rate to ampicillin, ceftriaxone, SMZ, and chloramphenicol. The  
206 resistance rate of ceftriaxone in serogroup C was 6.1%, while the resistance rate in  
207 serogroup E was the highest at 62.5%. To date, Ceftriaxone is still the first-line drug and  
208 serogroups has a certain guiding role in the selection of antibiotics. It is noteworthy that  
209 the drug resistance rate of Salmonella is gradually increasing. Garcia et al. in Peru  
210 reported multidrug-resistant Salmonella serovar Infantis (from serogroup C) were only  
211 sensitive to carbapenems(16). In our study, all carbapenems are sensitive. Considering  
212 that children with iNTS are more likely to have underlying diseases and have immune  
213 dysfunction, carbapenem antibiotics can be used as second-line antibiotics when severe  
214 invasive infections occur.

215 This study is a retrospective study, and the strains isolated from the specimens are only  
216 grouped into serogroups without serotype classification, which limits further analysis of  
217 molecular characteristics. Secondly, the specimens of invasive infection are mainly from  
218 blood, bone and joint, and there is very little from CSF and pleural effusion, which limits  
219 in-depth comparative analysis of clinical characteristics. However, the 109 iNTS cases are  
220 still a relatively large cohort and can provide meaningful reference for subsequent  
221 research on the clinical characteristics and treatment of Salmonella.

222 Conclusion: The clinical manifestations and treatment of iNTS infection in children are  
223 related to the site of invasion. Ceftriaxone is still the first-line antibiotic, but the resistance  
224 is gradually increasing. Carbapenems can be considered as second-line antibiotics in  
225 severe cases.

226

227

## References:

- 228 1. Stanaway JD, Parisi A, Sarkar K, Blacker BF, Reiner RC, Hay SI, et al. The global burden of  
229 non-typhoidal salmonella invasive disease : a systematic analysis for the Global Burden of Disease  
230 Study 2017. *LANCET INFECT DIS*. 2019 2019/1/1;19(12):1312-24.
- 231 2. Megged O, Assous M. Non-typhoidal Salmonella bacteremia : comparison of adults and children  
232 in a single medical center. *J MED MICROBIOL*. 2022 2022/1/1;71(5).
- 233 3. Marchello CS, Birkhold M, Crump JA. Complications and mortality of non-typhoidal salmonella  
234 invasive disease: a global systematic review and meta-analysis. *LANCET INFECT DIS*. [Journal  
235 Article; Meta-Analysis; Research Support, N.I.H., Extramural; Research Support, Non-U.S. Gov't;  
236 Systematic Review]. 2022 2022/5/1;22(5):692-705.
- 237 4. Hu Y, Wang J, Chen S, Li Y, Zhang R, Chen S. Non-typhoidal salmonella invasive infections in  
238 China. *LANCET INFECT DIS*. [Comment; Letter; Research Support, Non-U.S. Gov't]. 2022  
239 2022/7/1;22(7):939.
- 240 5. Matics TJ, Sanchez-Pinto LN. Adaptation and Validation of a Pediatric Sequential Organ Failure  
241 Assessment Score and Evaluation of the Sepsis-3 Definitions in Critically Ill Children. *JAMA*  
242 *PEDIATR*. [Journal Article; Observational Study; Validation Study]. 2017 2017/10/2;171(10):e172352.
- 243 6. Nor AA, Fadzilah MN, Mariam M, Anis SZ, Ariza A, Noor SM, et al. Community-acquired  
244 bacteremia in Paediatrics: Epidemiology, aetiology and patterns of antimicrobial resistance in a  
245 tertiary care centre, Malaysia. *Med J Malaysia*. [Journal Article]. 2016 2016/6/1;71(3):117-21.
- 246 7. Aoki Y, Kitazawa K, Kobayashi H, Senda M, Arahata Y, Homma R, et al. Clinical features of  
247 children with nontyphoidal Salmonella bacteremia: A single institution survey in rural Japan. *PLOS*  
248 *ONE*. [Journal Article]. 2017 2017/1/20;12(6):e176990.
- 249 8. Chang Y, Chen Y, Chen N, Hsu Y, Chu H, Chen C, et al. Changing Antimicrobial Resistance and  
250 Epidemiology of Non-Typhoidal Salmonella Infection in Taiwanese Children. *FRONT MICROBIOL*.  
251 2021;12.
- 252 9. Mohan A, Munusamy C, Tan Y, Muthuvelu S, Hashim R, Chien S, et al. Invasive Salmonella  
253 infections among children in Bintulu , Sarawak , Malaysian Borneo : a 6-year retrospective review.  
254 *BMC INFECT DIS*. 2019;19.
- 255 10. Woh PY, Yeung MPS, Nelson EAS, Goggins WBI. Risk factors of non-typhoidal Salmonella  
256 gastroenteritis in hospitalised young children : a case-control study. *BMJ PAEDIATR OPEN*. 2021  
257 2021/1/1;5(1).
- 258 11. Glover B, Charvat C, Weiss L, Kirpalani A, Shane AL, Li R, et al. Intravenous Antibiotic Duration  
259 for Nontyphoidal Salmonella Bacteremia in Children. *Hosp Pediatr*. [Journal Article]. 2022  
260 2022/7/1;12(7):e225-9.
- 261 12. Hess LM, Burdick B, Minard CG, Dutta A. IV Antibiotic Durations for Nontyphoidal Salmonella  
262 Bacteremia. *Hosp Pediatr*. [Journal Article; Observational Study]. 2019 2019/12/1;9(12):993-7.
- 263 13. Sirinavin S, Chiemchanya S, Vorachit M. Systemic nontyphoidal Salmonella infection in normal  
264 infants in Thailand. *PEDIATR INFECT DIS J*. [Journal Article]. 2001 2001/6/1;20(6):581-7.
- 265 14. Lee CM, Lee MS, Yang TL, Lee KL, Yen TY, Lu CY, et al. Clinical features and risk factors  
266 associated with bacteremia of nontyphoidal salmonellosis in pediatric patients, 2010-2018. *J*  
267 *FORMOS MED ASSOC*. [Journal Article]. 2021 2021/1/1;120(1 Pt 1):196-203.

- 268 15. Yang WC, Chan OW, Wu TL, Chen CL, Su LH, Chiu CH. Development of ceftriaxone resistance  
269 in *Salmonella enterica* serotype Oranienburg during therapy for bacteremia. *J MICROBIOL*  
270 *IMMUNOL*. [Case Reports; Journal Article; Research Support, Non-U.S. Gov't]. 2016  
271 2016/2/1;49(1):41-5.
- 272 16. Garcia C, Hinojosa N, Astocondor L, Ochoa T, Jacobs J, For TSCN. Characterization of  
273 ESBL-Producing *Salmonella enterica* Serovar Infantis Infection in Humans, Lima, Peru. *AM J TROP*  
274 *MED HYG*. [Journal Article; Research Support, Non-U.S. Gov't]. 2019 2019/10/1;101(4):746-8.
- 275
